# Supplementary material for: αvβ3-integrin regulates PD-L1 expression and is involved in cancer immune evasion
Source: PubMed Central journal article supplement — Proc Natl Acad Sci U S A. 2019 Sep 16;116(40):20141–50. doi: 10.1073/pnas.1901931116 (PMC6778255; doi:10.1073/pnas.1901931116), 2019-09-16
Supplement: pnas.1901931116.sapp.pdf [file pnas.1901931116.sapp.pdf]

## **SUPPLEMENTARY INFORMATION FOR**

### **$\alpha\beta 3$ -int regulates PD-L1 expression and is involved in cancer immune evasion**

Andrea Vannini, Valerio Leoni, Catia Barboni, Mara Sanapo, Anna Zaghini, Paolo Malatesta, and Gabriella Campadelli-Fiume, and Tatiana Gianni

Corresponding author Gabriella Campadelli-Fiume

Email: [gabriella.campadelli@unibo.it](mailto:gabriella.campadelli@unibo.it)

This PDF file includes:

Text, Materials and methods

Figs. S1 to S7

References for SI

## MATERIALS AND METHODS

### Cells.

SK-OV-3, MDA-MB-453, SK-BR-3 and 4T1 cells were purchased from American Type Culture Collection (ATCC) and cultured in RPMI 1640-GlutaMAX medium containing 10% heat-inactivated fetal bovine serum (FBS). SK-N-SH, U251, HT29, EO771 and B16 cells (ATCC) were grown in Dulbecco's modified Eagle's medium (DMEM) containing 5% or 10% FBS. HaCaT cells were received from Deutsch Krebs Forschung Zentrum (Heidelberg) and grown in high-glucose (4%) DMEM containing 10% FBS.  $\beta$ 3-int-silenced HaCaT and SK-N-SH cells (named HaCaT sh $\beta$ 3 and SK-N-SH sh $\beta$ 3, respectively) were grown as previously described (1). Wt GBM23 cells were derived from a female patient as described (2). The GBM sh $\beta$ 3 were derived by lentivirus transduction as described (1). Four different lentiviral stocks, each expressing a 29-mer shRNA for mouse  $\beta$ 3-int, were produced by the transfection of 293FT cells with lentiviral packaging plasmids (TR30037, OriGene) plus one of the four lentiviral vectors expressing shRNA for mouse  $\beta$ 3-int, GFP protein and the selection cassette (TL50112, OriGene). The same lentiviral vector expressing a noneffective 29-mer of scrambled shRNA (negative control, TR30021) was used to generate the lentiviral control stock. B16 cells were transduced with the lentiviral preparations and selected with 1  $\mu$ g/ml puromycin for two weeks to obtain B16sh $\beta$ 3 and B16shctrl respectively. Pure clones obtained by limited dilution were monitored for GFP and  $\beta$ 3-int expression by flow cytometry or reverse transcription and qRT-PCR. To transiently deplete  $\beta$ 3-int, B16 and 4T1 cells were transfected twice with ON-TARGET plus SMART pool siRNA (Dharmacon) for mouse  $\beta$ 3-int or nontargeting pool siRNA (control) to generate B16siRNA $\beta$ 3, 4T1siRNA $\beta$ 3, B16siRNActrl and 4T1siRNActrl cells, respectively. To transiently deplete  $\beta$ 6 and  $\beta$ 8 integrin, SK-N-SH and HT29 cells were transfected with ON-TARGET plus SMART pool siRNA for human  $\beta$ 6 and human  $\beta$ 8 integrins (Dharmacon) or human control siRNA (IBA Life Sciences) to obtain siRNA $\beta$ 6, siRNA $\beta$ 8 and siRNActrl cells, respectively (3). To generate SK-OV-3 cells expressing wt or mutant  $\alpha$ v $\beta$ 3-int, cells were transfected with plasmids encoding  $\alpha$ v<sub>wt</sub> plus either  $\beta$ 3<sub>wt</sub> or  $\beta$ 3<sub>Y747F,Y759F</sub>, selected with G418 for two weeks, and tested for integrin heterodimer expression before use. Plasmids expressing the  $\alpha$ v,  $\beta$ 3<sub>wt</sub> and  $\beta$ 3<sub>Y747F,Y759F</sub> integrins were a generous gift from Dr. S. Blystone (4).

### **Antibodies, soluble proteins and inhibitors.**

Abs against P-STAT1 (Y701), P-JAK1 (Y1022, Y1023), P-MEK1/2 (S217/221) P-SRC(Y416), P-FAK (Y397), STAT1, SOCS1 and tubulin were purchased from Cell Signaling. Anti-mouse and anti-rabbit horseradish peroxidase-conjugated Abs were purchased from Sigma-Aldrich. APC-conjugated anti-human (clone MIH1) and anti-mouse (clone MIH5) PD-L1, PE-Anti-Mouse CD274 (clone MIH5), APC Mouse IgG1  $\kappa$  (clone MOPC-21) and APC- an PE-Rat IgG2a,  $\lambda$  (clone B39-4) isotype controls, Alexa Fluor 488-conjugated anti-mouse and PE-conjugated anti-mouse Abs were purchased from Becton Dickinson Pharmingen. Anti-CD4-FITC (clone GK1.5), anti-CD8a-PE (clone 53–6.7), anti-CD45-Percp-Cy7 (clone 30-F11), anti-CD61 and anti-CD61-APC (clone HMBeta3-1), anti-mouse-IFNAR1-PE (clone MAR1-5A3), anti- mouse -CD119-PE (clone 2E2),anti- human-CD119-PE (clone GIR-208), anti- human-IFNAR1-PE (clone MA5-23630), PE- Mouse IgG1 kappa isotype control (clone P3.6.2.8.1), PE- and APC- Armenian Hamster IgG isotype controls (cloneBio299Arm) monoclonal antibodies (mAbs) were purchased from eBioscience. The R1.302 mAb against human nectin1 was a gift from M. Lopez (5). The L230 mAb against human integrin  $\alpha\beta 3$  was purchased from Santa Cruz Biotechnology. Recombinant human IFN $\beta$  (8499-IF/CF), IFN $\gamma$  (285-IF/CF), universal type I IFN (IFN $\alpha$ , 11200), murine IFN $\gamma$  (485-MI/CF) and IFN $\beta$  (8234-MB/CF) were supplied by R&D Systems. Cyclic [L-arginyl-glycyl-L- $\alpha$ -aspartyl-D-phenylalanyl-N-methyl-L-valyl] peptide, which is named *cln*, was supplied by Chematek SpA. Vitronectin from human plasma (V8379) and P-STAT1 inhibitor fludarabine were purchased from Sigma-Aldrich. P-MEK1/2 inhibitor U0126 was purchased form Selleckchem.

### **Western blot (WB).**

Cells depleted of  $\beta 3$ -int or pretreated with *cln* (200 ng/ml) for 18 h were or were not exposed to 50 U/ml of human or murine IFN $\alpha$ , IFN $\beta$ , or IFN $\gamma$  at 37°C for 10 min to detect P-JAK1; for 30 min to detect P-STAT1, T-STAT1 and P-MEK1/2; or for 4 h to detect SOCS1. Wt or silenced HaCaT cells were unexposed or treated to L230 (80 ng/ml), vitronectin (400 ng/ml) for 24 h, or induced with IFN $\alpha$ ,  $\beta$  or  $\gamma$  (50IU) for 30 min to detect P-SRC and P-FAK. For P-MEK1/2 inhibition, SK-N-SH cells were unexposed or exposed to U0126 for 24 h, and then treated with IFN $\gamma$ . For P-STAT1 inhibition, HaCaT cells were unexposed or exposed to fludarabine for 24 h, and then treated with IFN $\beta$ . SDS-PAGE and WB were performed as detailed (6).

### **Reverse transcription and qRT-PCR.**

Total RNA was extracted by using a Total RNA Isolation kit (Macherey-Nagel) and reverse transcribed with a high-capacity cDNA reverse transcription kit (Applied Biosystems). Real-time

PCR assays were performed using the following TaqMan probes (Thermo Fisher Scientific): human CD274 (Hs01125301\_m1), IFNAR1 (Hs01066116\_m1), IFNGR1 (Hs00166223\_m1), ITGB3 (Hs1001469\_m1), ITGB6 (Hs00982345\_m1), ITGB8 (Hs00174456\_m1), IRF7 (Hs01014809\_g1), SOCS1 (Hs00705164\_s1) and GAPDH (Hs99999905\_m1) and mouse Cd274 (Mm00452054\_m1), Itgb3 (Mm00471209\_m1), IFN $\gamma$  (Mm01168134\_m1) and Rpl13a (Mm01612987\_g1). Relative changes in gene expression were determined using the  $2^{-\Delta\Delta C_t}$  method, and gene expression levels were normalized to those of GAPDH (human genes) or Rpl13a (mouse genes).

### ***In vivo* experiments.**

C57BL/6 mice were obtained from The Jackson Laboratories. BALB/c mice were obtained from Charles River Laboratories. NOD-scid mice were provided by PLAISANT, Rome. Mice were bred in a facility at the Department of Veterinary Medical Sciences, University of Bologna. Animal experimentation was carried out at the Department of Veterinary Medical Sciences or at PLAISANT, Rome. B16siRNA $\beta$ 3, B16siRNActrl, 4T1siRNA $\beta$ 3, 4T1siRNActrl, B16sh $\beta$ 3 and B16shctrl cells in 100-250  $\mu$ L of PBS each were implanted subcutaneously in the left flank of six- to eight-week-old mice at  $1 \times 10^6$  cells/mouse for B16 cells and  $1 \times 10^5$  cells/mouse for 4T1 cells. Tumor volumes were scored twice weekly as described (7). Mice that did not develop B16siRNA $\beta$ 3 primary tumors received a contralateral tumor 18 d after primary tumor implantation. The contralateral tumor consisted of B16siRNActrl cells implanted subcutaneously in the right flank at  $1 \times 10^6$  cells/mouse. The mice were killed 24 d later or when tumor volumes exceeded 1000–2000 mm<sup>3</sup>, ulceration occurred, or the animals exhibited distress or pain. For the combination experiments, mice were implanted with wt or sh $\beta$ 3 B16 cells and intraperitoneally (i.p.) administered anti-PD-1 (200  $\mu$ g/mouse) (Bio X Cell) after 7, 12, or 18 d.

### **Splenocyte reactivity to B16 and 4T1 cells.**

Splenocytes were obtained as described earlier (7), counted, seeded in 24-well plates ( $1 \times 10^6$  cell/well), incubated with  $1 \times 10^5$  B16, 4T1 in 0.5 ml medium, and cocultured for 48 h. The media were collected, and the amount of secreted IFN $\gamma$  was quantified by ELISA (IFN- $\gamma$  Mouse ELISA Kit, Thermo Fisher).

### **Intratumoral IFN $\gamma$ .**

Tumors in PBS were smashed through a 70  $\mu$ m cell strainer with a sterile 5 ml syringe plunger to isolate the cells. A portion of the tumor cells was centrifuged and resuspended in 500  $\mu$ L of lysis buffer (50 mM Tris-HCl, pH 7.4, 250 mM NaCl, 5 mM EDTA, 1 mM Na<sub>3</sub>VO<sub>4</sub>, 50 mM NaF, 0.02%

NaN<sub>3</sub>, 0.5% sodium deoxycholate, 1% NP-40, 0.3 mM N<sup>α</sup>-p-tosyl-L-lysine chloromethyl ketone hydrochloride, 0.3 mM N<sup>α</sup>-p-tosyl-L-phenylalanine chloromethyl ketone, and 1 mM phenylmethane sulfonyl fluoride (PMSF)). Samples were incubated at 4°C for 1 h and subsequently centrifuged for 30 min at 11000 × g. The protein content of the supernatants was determined with a Bio-Rad protein assay (Bio-Rad). The amount of IFN $\gamma$  per 1 mg of total protein was quantified by a Mouse IFN $\gamma$  ELISA kit.

### **Serum reactivity.**

Trypsinized B16, 4T1 and EO771 cells were incubated for 1 h with sera (1:60 dilution) from mice at the end of the tumor challenge experiments (7). The cells were washed with FACS buffer and incubated with anti-mouse PE (1:400). The MFI of B16, 4T1 and EO771 cells that reacted to the mouse sera were quantified by flow cytometry by means of a BD C6 Accuri flow cytometer.

### **Intratumoral and spleen-infiltrating lymphocytes.**

Single-cell suspensions were prepared from freshly isolated B16 and 4T1 tumors and spleens at sacrifice. Tumors and spleens were processed as described above. For each sample, 2×10<sup>6</sup> cells were reacted with the following antibodies: CD4-FITC, CD8a-PE, CD45-Percp-Cy7 and PD-L1-APC. Data were acquired on a BD C6 Accuri flow cytometer. Only samples that provided at least 100000 events were included in the subsequent analysis.

**SUPPLEMENTARY FIGURE**

**Fig. S1 (a)**

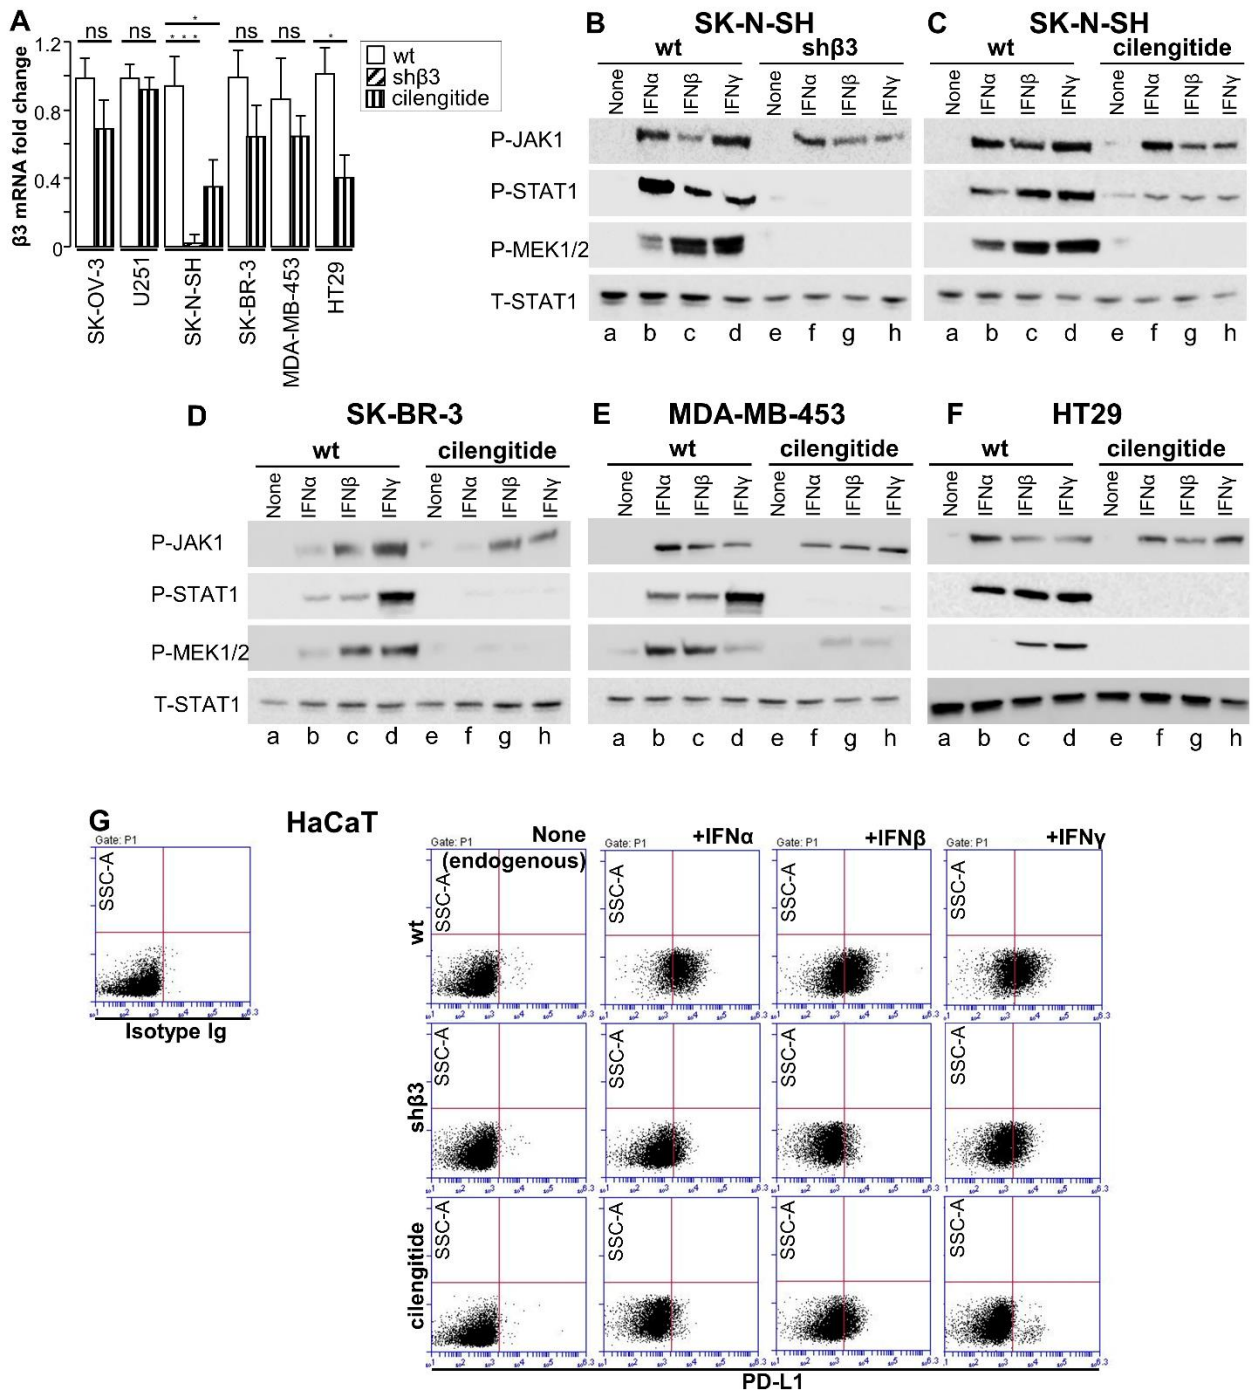

**Fig. S1 (b)**

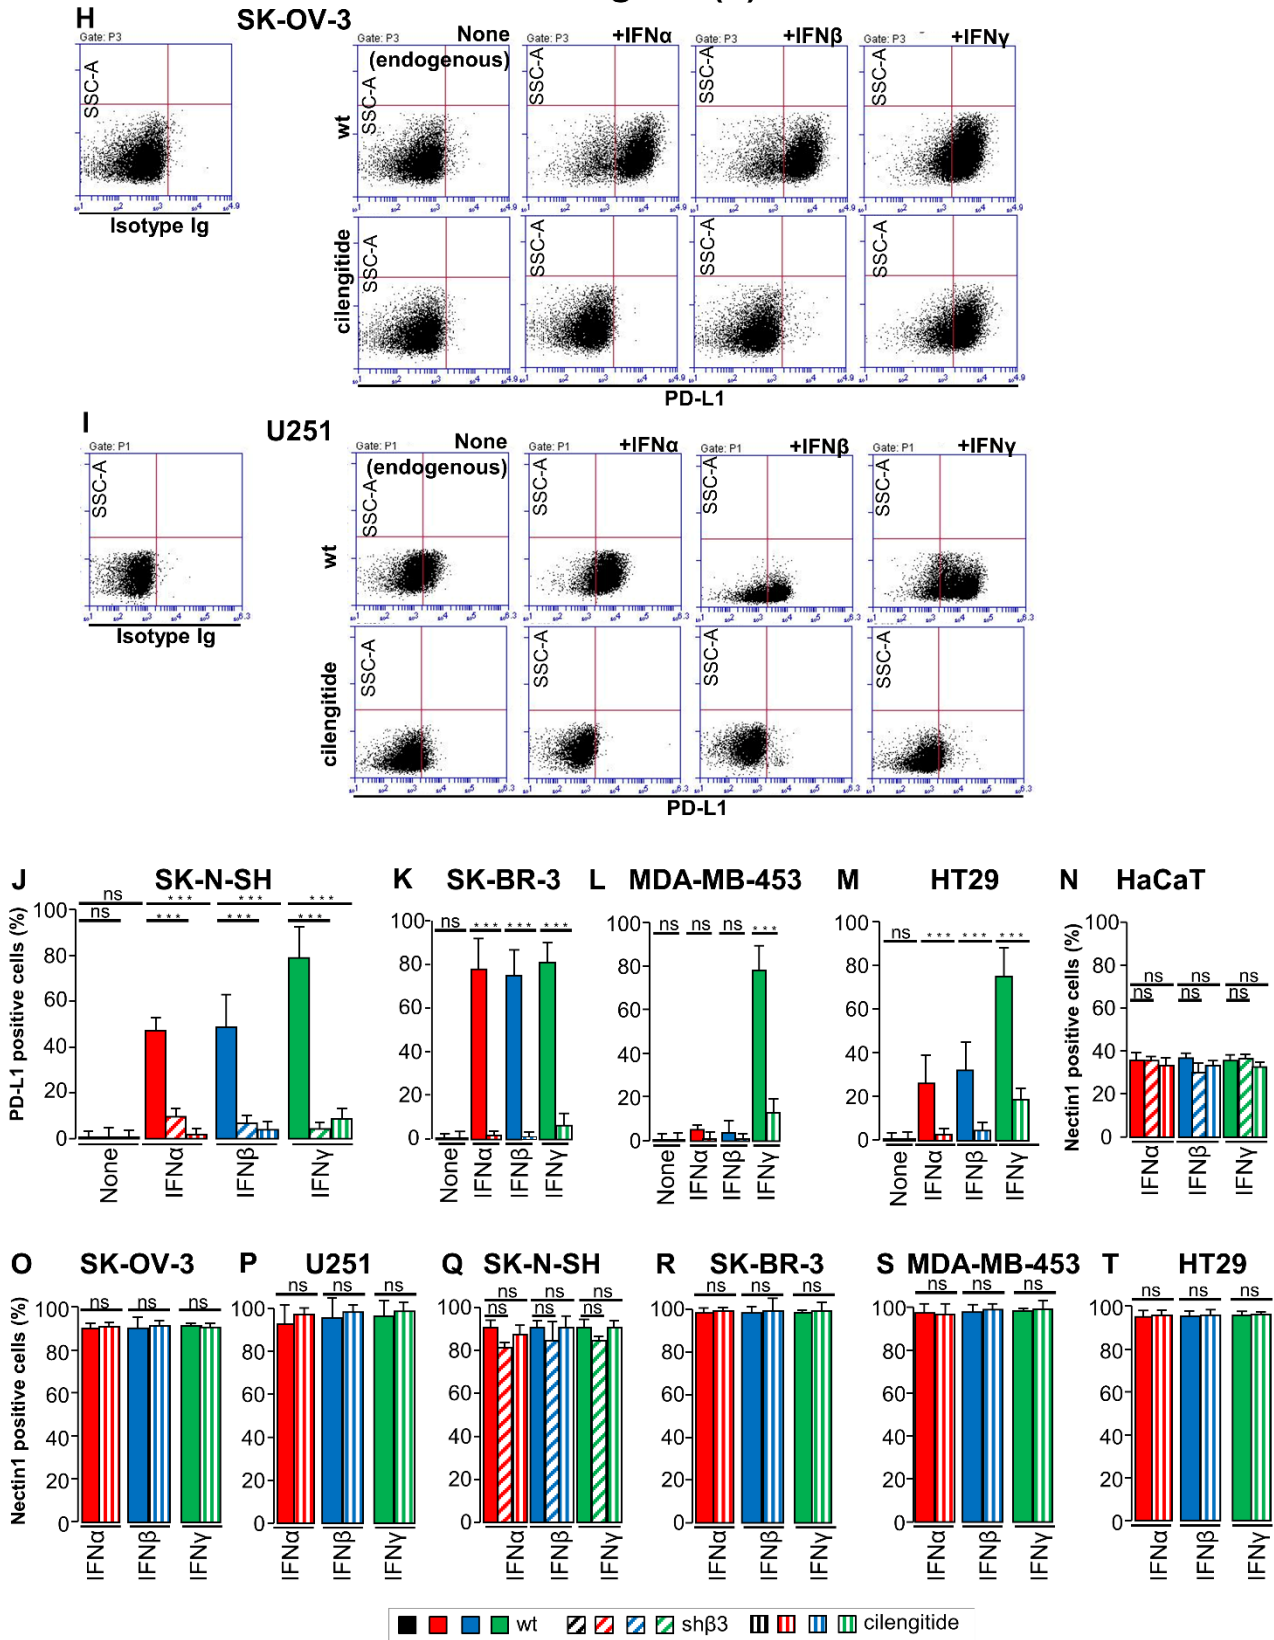

**Fig. S1.  $\beta$ 3-int depletion or inhibition hinders the signaling cascade of IFN $\alpha/\beta$  and  $\gamma$  receptors and decreases PD-L1 expression.** (A)  $\beta$ 3-int expression in SK-OV-3, U251, SK-N-SH, SK-BR-3, MDA-MB-453 and HT29, untreated, treated with *cln* or silenced by means of sh $\beta$ 3 lentiviral transfection. mRNA levels were measured by qRT-PCR. (B-F) Effects of  $\beta$ 3-int depletion (sh $\beta$ 3) or inhibition with *cln* on the signaling pathway of IFN $\alpha/\beta$  and  $\gamma$  receptors in SK-N-SH, SK-BR-3, MDA-



MB-453, and HT29 cells. Details as in the legend to Fig. 1 B-E. (G-I) Representative raw plots of flow cytometry data presented in Fig. 1, F-H. HaCaT, SK-OV-3 and U251 cells were unexposed or exposed to IFN $\alpha$ , IFN $\beta$  or IFN $\gamma$  (see Fig. 1 legends for the details) for 24 h and stained with isotype Ig-APC or anti-PD-L1-APC. (J-M) Effect of  $\beta$ 3-int depletion (sh $\beta$ 3) or inhibition with *cln* on PD-L1 expression in SK-N-SH, SK-BR-3, MDA-MB-453 and HT29 cells, as detected by flow cytometry. Details as in the legend to Fig. 1 F-H. (N-T) Effect of  $\beta$ 3-int depletion (sh $\beta$ 3) or inhibition with *cln* on expression of nectin1, as detected by flow cytometry. The amounts of IFNs for PD-L1 expression assay were as follows: 100 IU in SK-N-SH and SK-BR-3 cells; 500 IU in HT29 cells; 1000 IU in MDA-MB-453 cells. In panels A, J-T, histograms represent the average of triplicates  $\pm$  SD. Statistical significance was calculated by means of t-test (panels A, K-M, O, P, R-T) or one-way ANOVA (panel A, J, N, Q).



**Fig. S2 (a)**

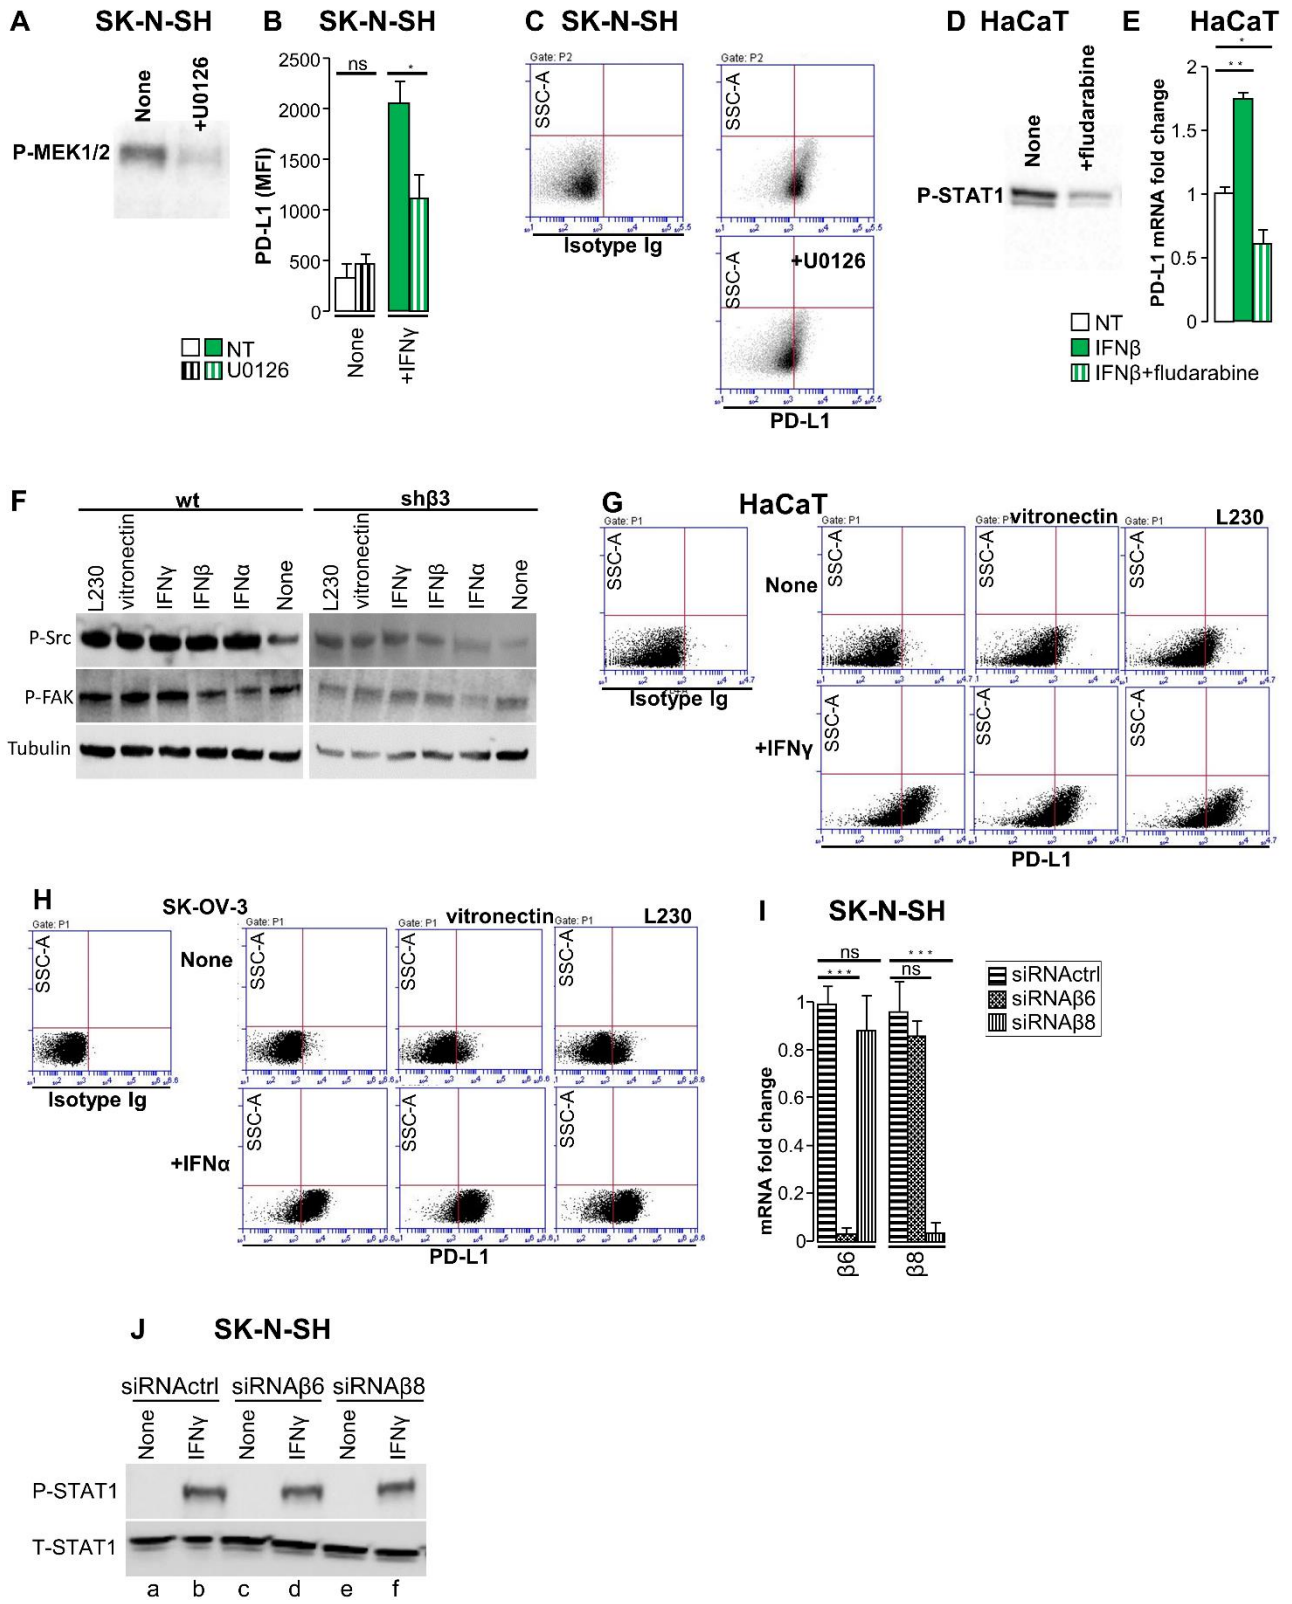

**Fig. S2 (b)**

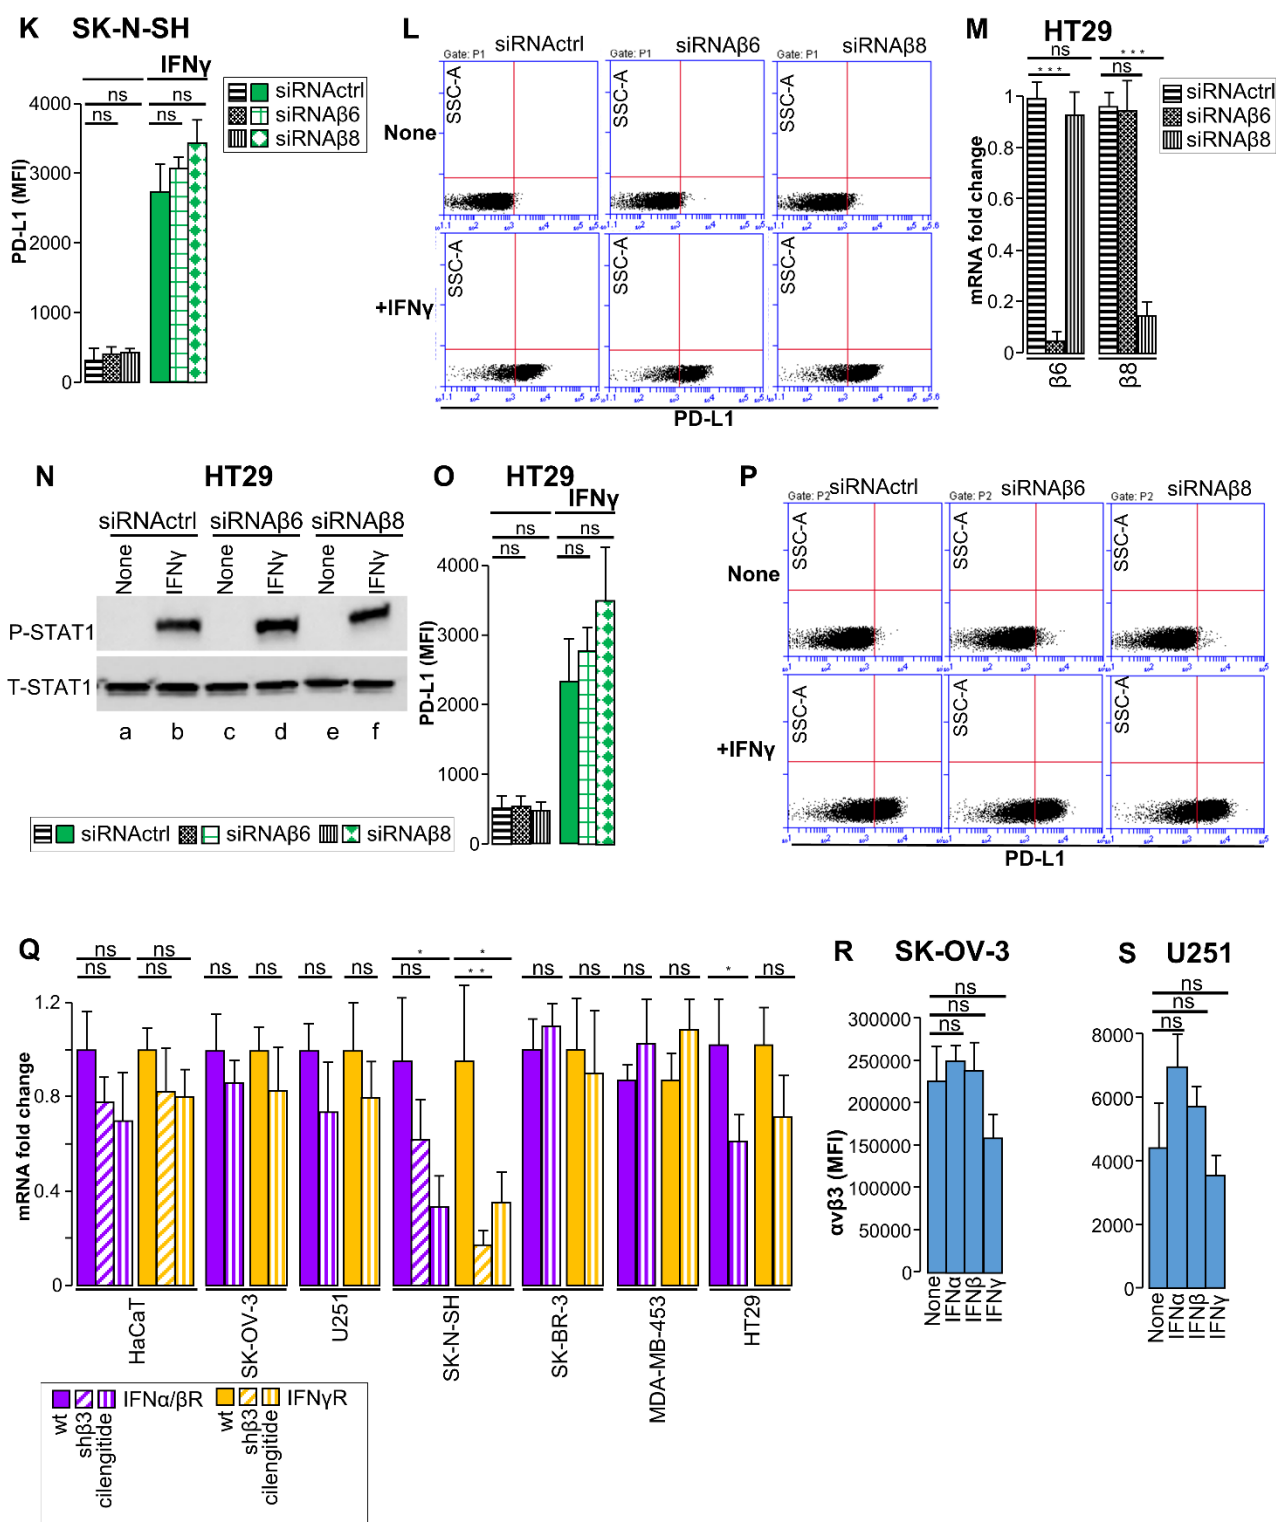

**Fig. S2.  $\beta 3$ -int depletion or inhibition hinders the signaling cascade of IFN $\alpha/\beta$  and  $\gamma$  receptors and decreases PD-L1 expression.** (A-C) Effects of P-MEK1/2 inhibition on PD-L1 expression. (A) SK-N-SH cells were unexposed (None) or exposed to U0126 for 24 h. Then, samples were exposed or not to IFN $\gamma$  for 24 h. Cell lysates were extracted as detailed in the legend to Fig. 1. Lysates were subjected to SDS-PAGE and P-MEK1/2 was detected by WB. (B) Cells treated with U0126 and/or with IFN $\gamma$  were stained with Ig-APC or anti-PD-L1-APC, and MFI values were measured by flow cytometry. APC-MFI values are plotted. (C) Representative raw plots of flow cytometry data presented in panel B. (D-E) Effects of P-STAT1 inhibition on PD-L1 expression. (D) HaCaT cells

were unexposed (None) or exposed to fludarabine for 24 h. Then, samples were exposed or not to IFN $\beta$  for 24 h. Cell lysates were extracted as detailed in the legend to Fig. 1. Lysates were subjected to SDS-PAGE and P-STAT1 was detected by WB. (E) Cells treated with fludarabine and/or with IFN $\beta$  were stained with Ig-APC or anti-PD-L1-APC, and MFI values were measured by flow cytometry. APC-MFI values are plotted. (F) Wt or silenced HaCaT cells were unexposed (None) or treated to L230 (80 ng/ml), vitronectin (400 ng/ml) for 24 h, or induced with IFN $\alpha$ ,  $\beta$  or  $\gamma$  (50IU) for 30 min. Cell lysates were extracted as detailed in the legend to Fig. 1. Lysates were subjected to SDS-PAGE and P-SRC, P-FAK, and tubulin (control) were detected by WB. (G, H) Representative raw plots of flow cytometry data presented in Fig. 1, panels I and J, respectively. (I-P) SH-N-SH or HT29 cells were transiently depleted of  $\beta$ 6-integrin (siRNA $\beta$ 6),  $\beta$ 8-integrin (siRNA $\beta$ 8), or mock-depleted (siRNActrl) for 48 h by means of ON-TARGET plus (Dharmacon). (I, M) Integrins silencing was quantified by qRT-PCR. (J, N) Effect of  $\beta$ 6 or  $\beta$ 8 integrin silencing on STAT1 phosphorylation. Wt or silenced SH-N-SH and HT29 cells were exposed to 50 IU IFN $\gamma$  for 30 min. Cell lysates were extracted as detailed in the legend to Fig. 1. Lysates were subjected to SDS-PAGE and P-STAT1 and T-STAT1 were detected by WB. (K, O) Effect of  $\beta$ 6 or  $\beta$ 8 integrin silencing on PD-L1 levels. Cells were untreated or exposed to IFN $\gamma$  for 48 h. Amounts of IFN $\gamma$  were 100 IU and 500 IU for SK-N-SH or HT29 cells, respectively. Cells were stained with Ig-APC or anti-PD-L1-APC, and MFI values were measured by flow cytometry. APC-MFI values are plotted. (L, P) Representative raw plots of flow cytometry data presented in panels K and O. (Q) Expression of IFNAR1 or IFNGR1 mRNA in HaCaT, SK-OV-3, U251, SK-N-SH, SK-BR-3, MDA-MB-453 or HT29 cells, depleted of  $\beta$ 3-int, or treated with *clin*. (R, S) Expression of  $\alpha$ v $\beta$ 3 in SK-OV-3 and U251, untreated (None) or treated with IFN $\alpha$ , IFN $\beta$  or IFN $\gamma$ . Cells were stained with isotype Ig-APC or anti- $\alpha$ v $\beta$ 3-APC, and APC-MFI values are plotted. In panels B, E, I, K, M, O, Q, R, S, histograms represent the average of triplicates  $\pm$  S.D. Statistical significance was calculated by means of the t-test (B, Q) or one-way ANOVA (panel E, I, K, M, O, Q, R, S).

**Fig. S3**

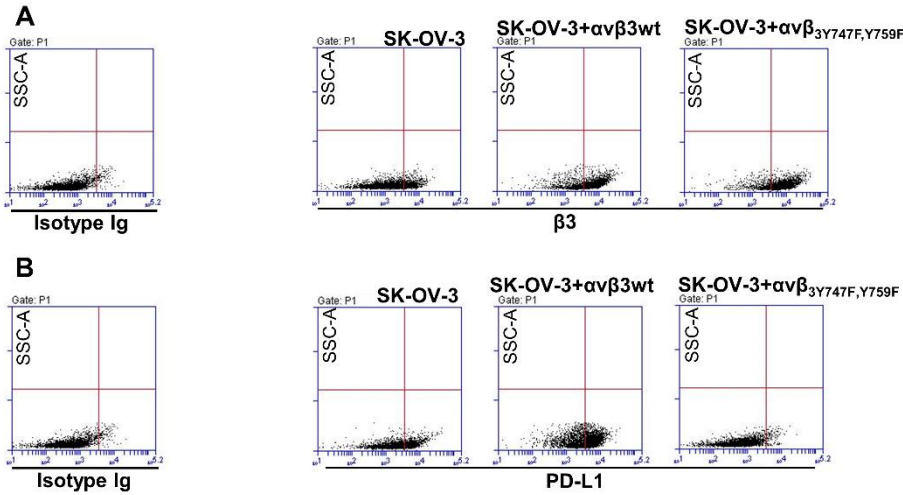

**Fig. S3. Mutations in  $\beta\text{3}$  integrin C-tail hinder the signaling cascade of IFN $\alpha$  receptor.** (A-B) Representative raw plots of flow cytometry data presented in Fig. 3. (A) SK-OV-3 wt cells, or cells overexpressing  $\alpha\text{v}$  plus wt- $\beta\text{3}$  integrin subunit ( $\alpha\text{v}\beta\text{3}_{\text{wt}}$ ), or mutant,  $\beta\text{3}_{\text{Y747F,Y759F}}$  integrin subunit ( $\alpha\text{v}\beta\text{3}_{\text{Y747F,Y759F}}$ ) were stained with isotype Ig-APC or anti- $\beta\text{3}$ -APC. The APC-MFI values are plotted in Fig. 3, A. (B) SK-OV-3 wt,  $\alpha\text{v}\beta\text{3}_{\text{wt}}$ , or  $\alpha\text{v}\beta\text{3}_{\text{Y747F,Y759F}}$  were exposed to IFN $\alpha$  (100 IU) for 48 h and stained with isotype Ig-APC or anti-PD-L1-APC. The APC-MFI values are plotted in Fig. 3, C.

**Fig. S4**

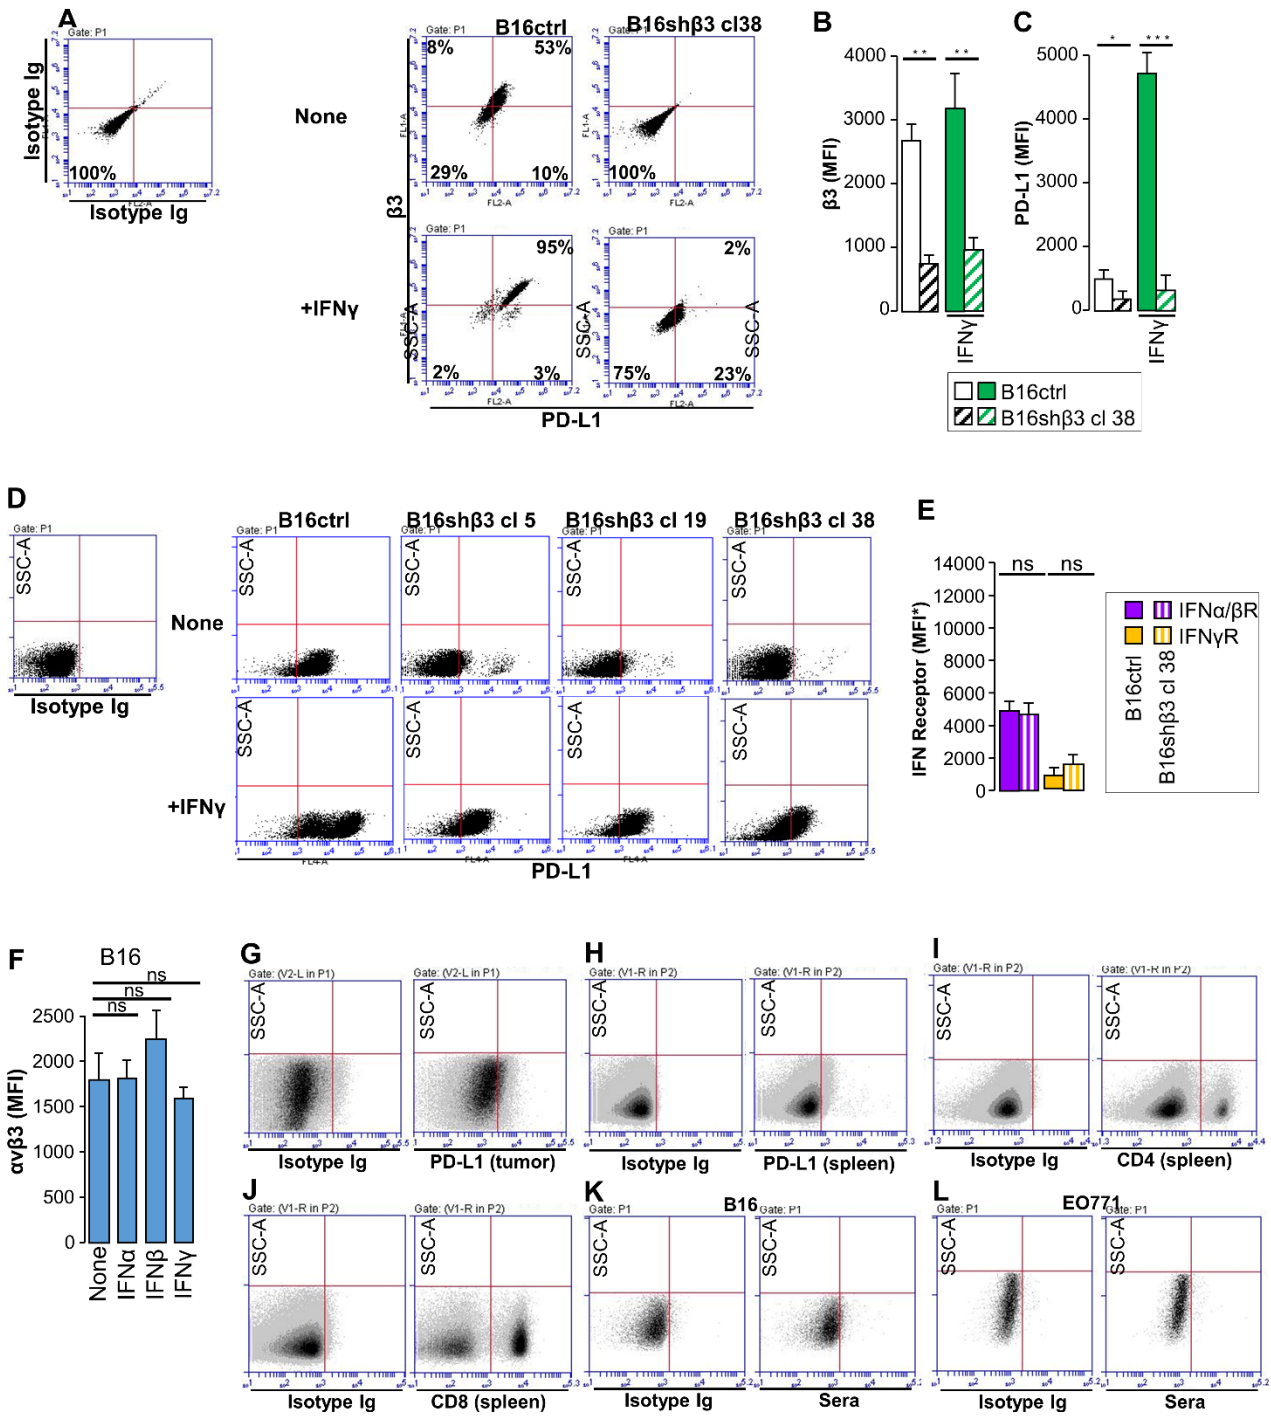

**fig. S4. B16 murine cancer cells stably depleted of  $\beta$ 3-int exhibit reduced PD-L1 expression *in vitro* and *in vivo*, reduced tumor growth *in vivo* and elicit a durable immune response.** (A-L) IFN $\alpha/\beta/\gamma$  MFI,  $\alpha\beta$ 3 MFI and representative raw plots of flow cytometry data presented in Fig. 4. (A) B16ctrl and B16sh $\beta$ 3 (cl 38) cells were stained with isotype Ig-PE or anti-PD-L1-PE, and at the same time with anti- $\beta$ 3, followed by the staining with Ig-FITC or anti-mouse-FITC (B)  $\beta$ 3 (FITC) MFI values of panel A. (C) PD-L1(PE) MFI of panel A. (D) B16ctrl and B16sh $\beta$ 3 cells (cl 5, 19 and 38) cells were unexposed or exposed to IFN $\gamma$  (100 IU) for 24 h and stained with isotype Ig-APC or anti-PD-L1-APC. The APC-MFI values are plotted in Fig. 4, B. (E) Expression of IFN $\alpha/\beta$  and  $\gamma$  receptors

in B16 cells, wt or depleted of  $\beta 3$ -int. B16 cells were stained with isotype Ig-PE or anti-IFN $\alpha/\beta$  and  $\gamma$  receptors-PE. The IFNR-PE MFI values subtracted of isotype MFI values are plotted (MFI\*). (F) Expression of  $\alpha v\beta 3$  in B16 cells, untreated (None) or treated with IFN $\alpha$ , IFN $\beta$  or IFN $\gamma$ . Cells were stained with isotype Ig-APC or anti- $\beta 3$ -APC, and APC-MFI values are plotted. (G) Tumor cells were gated on CD45- population (CD45-peCy7, cut-off  $3 \times 10^3$ ) and stained with isotype Ig-APC or anti-PD-L1-APC. The APC-MFI values are plotted in Fig. 4, I. (H) Splenocytes were gated on CD45+ population (CD45-peCy7, cut-off  $3 \times 10^3$ ) and stained with isotype Ig-APC or anti-PD-L1-APC. The APC-MFI values are plotted in Fig. 4, J. (I) Splenocytes were gated on CD45+ population (CD45-peCy7, cut-off  $3 \times 10^3$ ) and stained with isotype Ig-FITC or anti-CD4-FITC. Cut-off line (red vertical line) for FITC-channel is set at  $2 \times 10^3$  and the percentages of positive cells are plotted in Fig. 4, K. (J) Splenocytes were gated on CD45+ population (CD45-peCy7, cut-off  $3 \times 10^3$ ) and stained with isotype Ig-PE or anti-CD8-PE. Cut-off line (red vertical line) for PE-channel is set at  $1.2 \times 10^3$  and the percentages of positive cells are plotted in Fig. 4, L. (K-L) B16 and EO771 cells were reacted with mice sera (1:60) and stained with isotype Ig-PE or anti-mouse-PE. The PE-MFI values are plotted in Fig. 4, N. In panels B, C, E, and F, histograms represent the average of triplicates  $\pm$  SD. Statistical significance was calculated by means of t-test (panels B, C, E) or one-way ANOVA (panel F).



**Fig. S5**

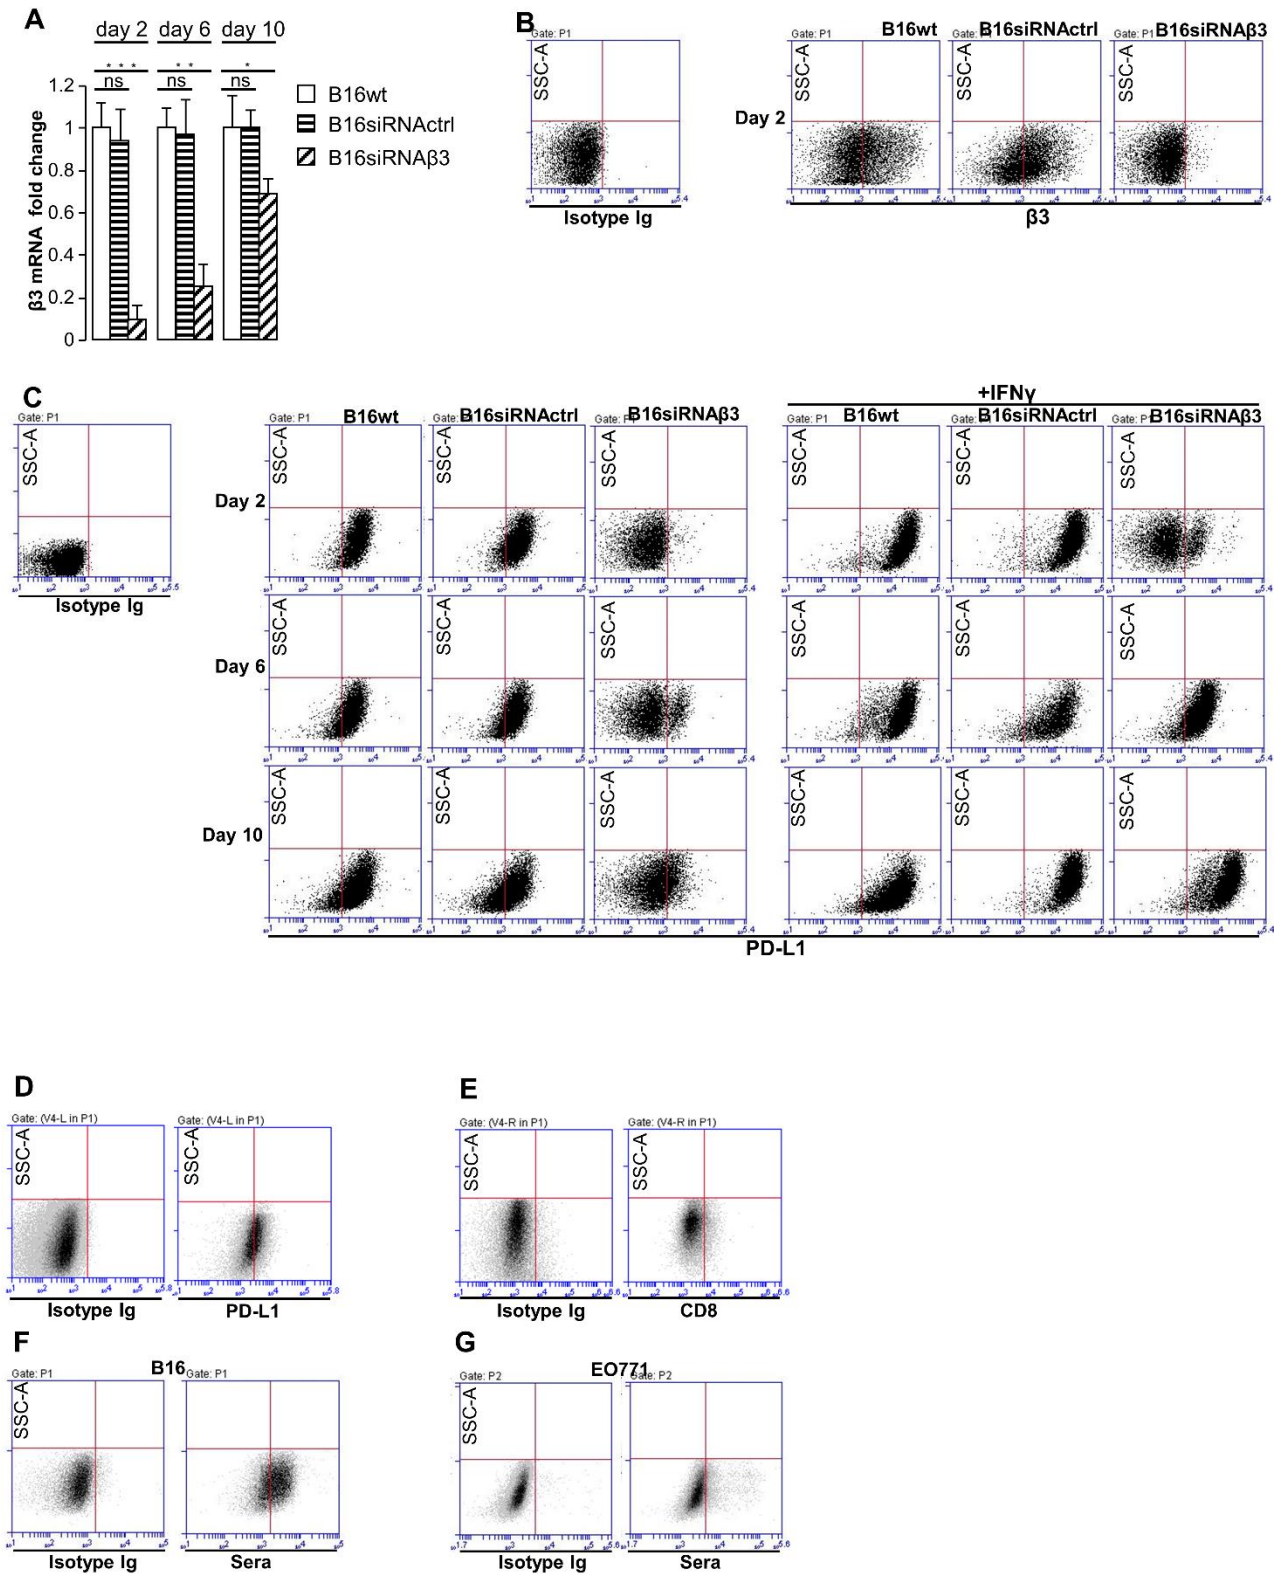

**Fig. S5. B16 murine cancer cells transiently depleted of  $\beta 3$ -int exhibit a reduction in PD-L1 expression *in vitro*, in the growth of primary and challenge tumor, and the challenge tumors show signs of immunotherapeutic effects. Long term reactivity of splenocyte and serum. (A-G) qRT-PCR and representative raw plots of flow cytometry data presented in Fig. 5. (A) Extent of  $\beta 3$ -**



int silencing in B16siRNActrl or B16siRNA $\beta$ 3 cells, measured by qRT-PCR 2, 6, 10 days after siRNA transfection. (B) B16wt, B16siRNActrl and B16siRNA $\beta$ 3 cells were stained with isotype Ig-APC or anti- $\beta$ 3-APC, 2 days after transfection. The APC-MFI values are plotted in Fig. 5, A (day 2). (C) B16wt, B16siRNActrl and B16siRNA $\beta$ 3 cells were unexposed or exposed to IFN $\gamma$  (100 IU) for 24 h and stained with isotype Ig-APC or anti-PD-L1-APC. The APC-MFI values are plotted in Fig. 5, B. (D) Tumor cells were gated on CD45<sup>-</sup> population (CD45-peCy7, cut-off  $3 \times 10^3$ ) and stained with isotype Ig-APC or anti-PD-L1-APC. The APC-MFI values are plotted in Fig. 5, I. (E) Tumor infiltrating leucocytes (TILs) were gated on CD45<sup>+</sup> population (CD45-peCy7, cut-off  $3 \times 10^3$ ) and stained with isotype Ig-PE or anti-CD8-PE. Cut-off line (red vertical line) for PE-channel is set at  $6 \times 10^3$  and the percentages of positive cells are plotted in Fig. 5, J. (F, G) B16 and EO771 cells were reacted with mice sera (1:60) and then stained with isotype Ig-PE or anti-mouse-PE. The PE-MFI values are plotted in Fig. 5, L. In panel A, histograms represent the average of triplicates  $\pm$  SD and statistical significance was calculated by means of one-way ANOVA.

**Fig. S6**

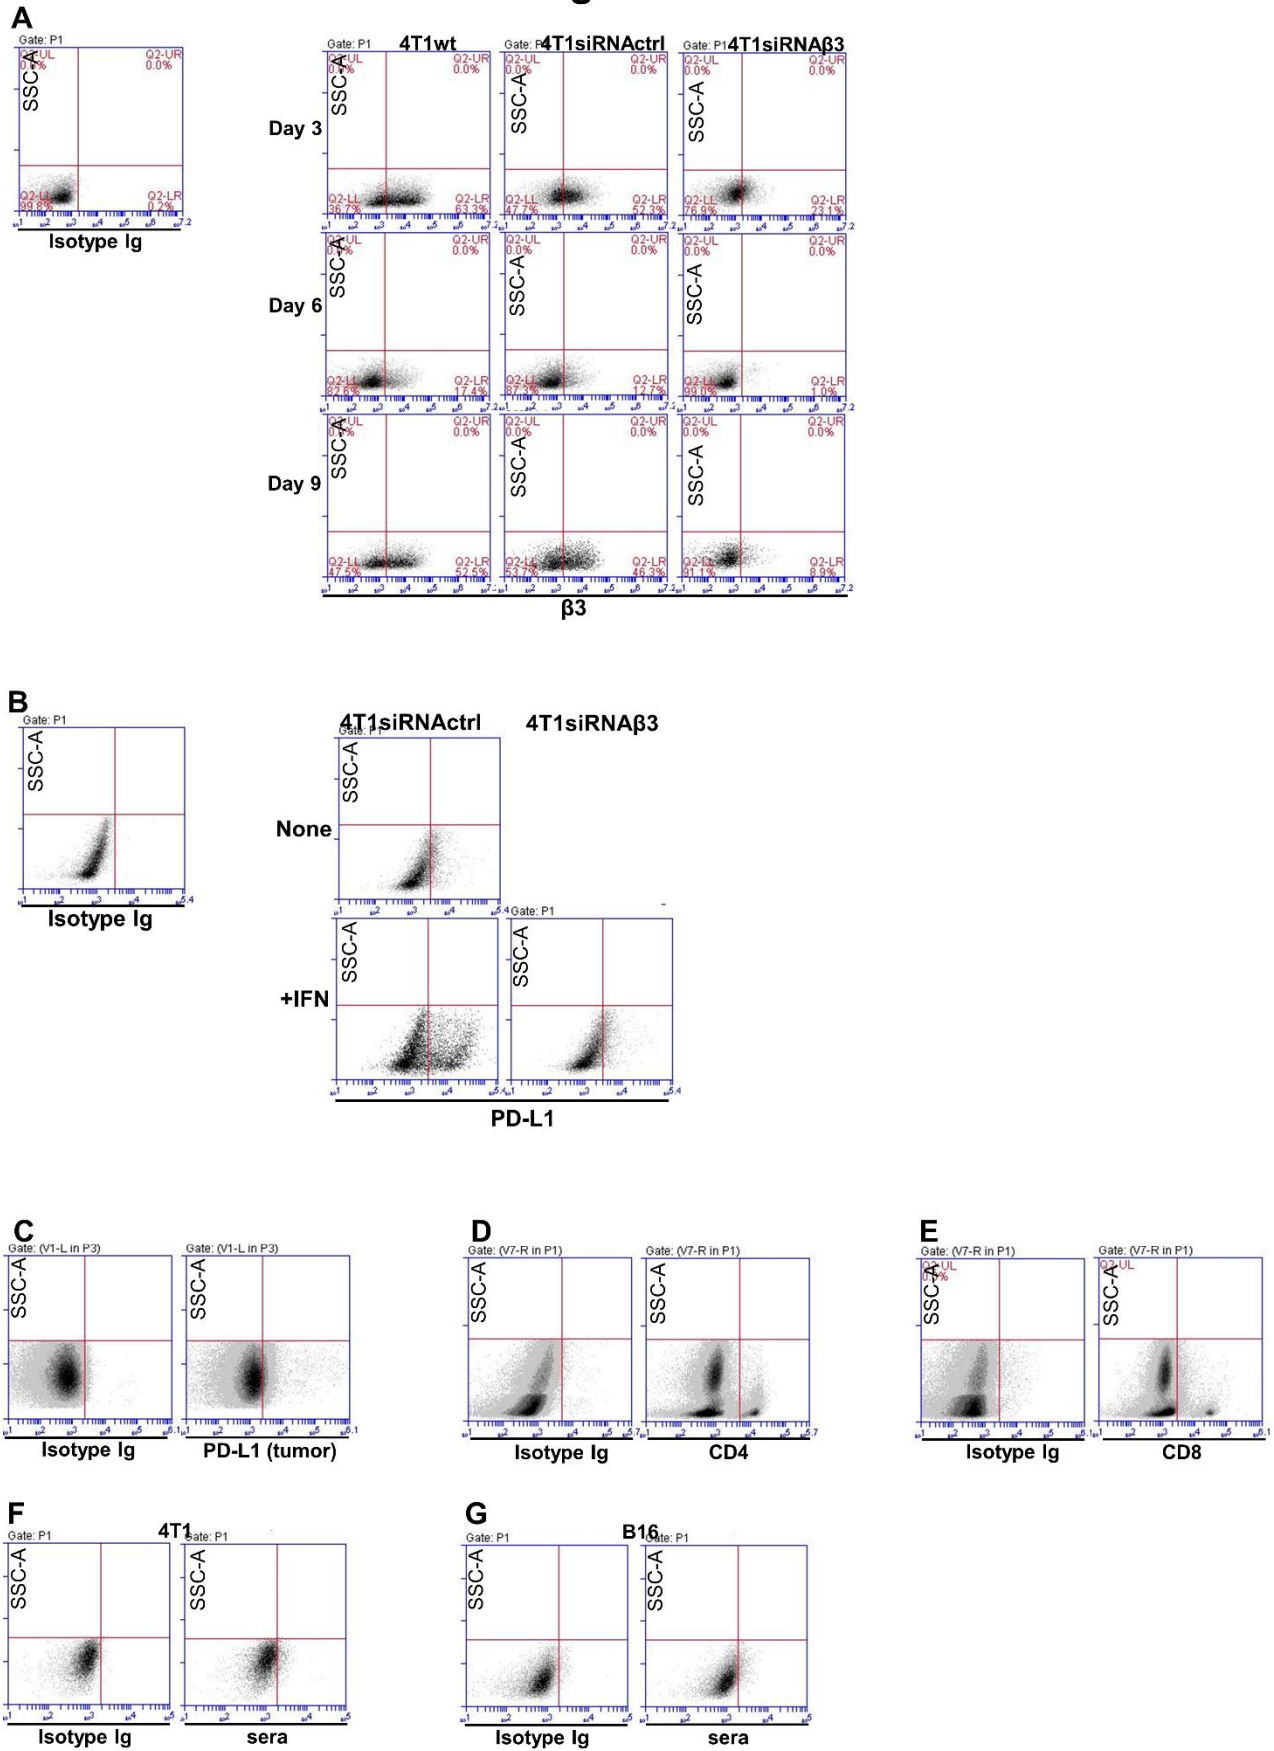

**Fig. S6. 4T1 murine cancer cells transiently depleted of β3-int exhibit a reduction in PD-L1**

**expression *in vitro* and in the growth of primary tumor. Long term reactivity of splenocyte and serum.** (A-G) Representative raw plots of flow cytometry data presented in Fig. 6. (A-B) Effect of transient  $\beta 3$ -int depletion on PD-L1 expression. 4T1 cells were transiently depleted of  $\beta 3$ -int by siRNA $\beta 3$  (4T1siRNA $\beta 3$ ), or mock depleted by scrambled siRNA control (4T1siRNActrl), by siRNA transfection. (A) Extent of silencing measured by flow cytometry at 3, 6, 9 days after siRNA transfection. 4T1wt, 4T1ctrl and 4T1sh $\beta 3$  cells were stained with isotype Ig-APC or anti- $\beta 3$ -APC, at the indicated days after transduction. The APC-MFI values are plotted in Fig 6 A. (B) Reduction in PD-L1 expression in  $\beta 3$ -int depleted cells. 4T1wt, 4T1siRNActrl or 4T1siRNA $\beta 3$  cells were unexposed (no IFN) or exposed to IFN $\gamma$  (100 IU) for 24 h. Cells were stained with isotype Ig-APC or anti-PD-L1-APC. The APC-MFI values are plotted in Fig 6 B. (C) Tumor cells were gated on CD45- population (CD45-peCy7, cut-off  $3 \times 10^3$ ) and stained with isotype Ig-APC or anti-PD-L1-APC. The APC-MFI values are plotted in Fig. 6, G. (D) Tumor cells were gated on CD45+ population (CD45-peCy7, cut-off  $3 \times 10^3$ ) and stained with isotype Ig-PE or anti-CD4-PE. Cut-off line (red vertical line) for PE-channel is set at  $6 \times 10^3$  and the percentages of positive cells are plotted in Fig. 6, I. (E). Tumor cells were gated on CD45+ population (CD45-peCy7, cut-off  $3 \times 10^3$ ) and stained with isotype Ig-PE or anti-CD8-PE. Cut-off line (red vertical line) for PE-channel is set at  $6 \times 10^3$  and the percentages of positive cells are plotted in Fig. 6, J. (F, G) 4T1 and B16 cells were reacted with mice sera (1:60) and then stained with isotype Ig-PE or anti-mouse-PE. The PE-MFI values are plotted in Fig. 6, L.

**Fig. S7**

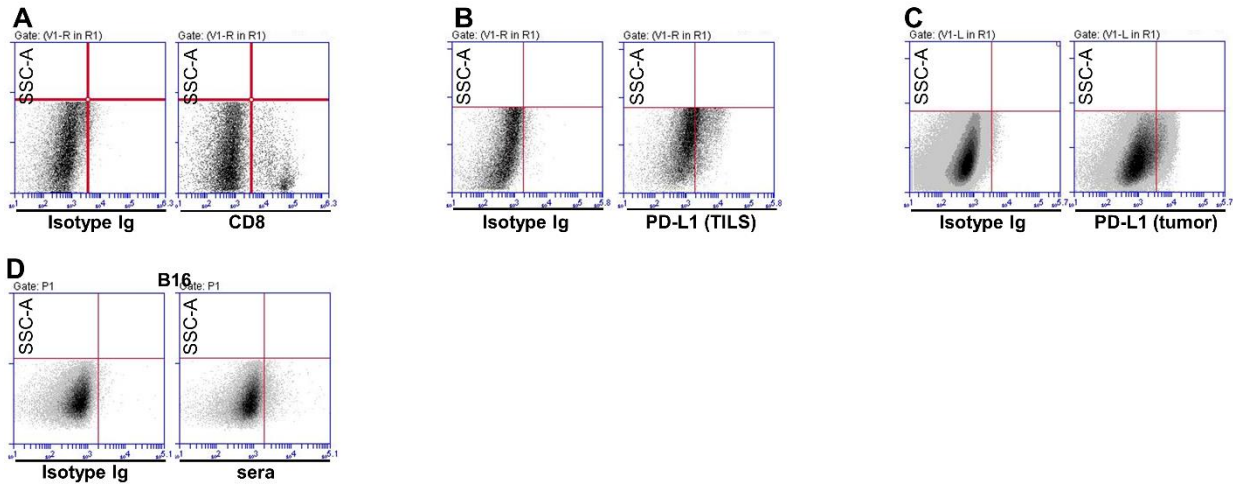

Fig.

S7. The combination of  $\beta$ 3-int depletion and anti-PD-1 therapy elicits an immunotherapeutic abscopal effect. (A-D) Representative raw plots of flow cytometry data presented in Fig. 7. (A) TILS were gated on CD45+ population (CD45-peCy7, cut-off  $3 \times 10^3$ ) and stained with isotype Ig-PE or anti-CD8-PE. Cut-off line (red vertical line) for PE-channel is set at  $3.5 \times 10^3$  and the percentages of positive cells are plotted in Fig. 7, I. (B) TILS were gated on CD45+ population (CD45-peCy7, cut-off  $3 \times 10^3$ ) and stained with isotype Ig-APC or anti-PD-L1-APC. The APC-MFI values are plotted in Fig. 7, K. (C) Tumor cells were gated on CD45- population (CD45-peCy7, cut-off  $3 \times 10^3$ ) and stained with isotype Ig-APC and anti-PD-L1-APC. The APC-MFI values are plotted in Fig. 7, L. (D) B16 cells were reacted with mice sera (1:60) and then stained with isotype Ig-PE or anti-mouse-PE. The PE-MFI values are plotted in Fig. 7, N.

## REFERENCES

1. Gianni T, Leoni V, & Campadelli-Fiume G (2013) Type I interferon and NF-kappaB activation elicited by herpes simplex virus gH/gL via alphavbeta3 integrin in epithelial and neuronal cell lines. *J Virol* 87(24):13911-13916.
2. Carra E, et al. (2013) Sorafenib selectively depletes human glioblastoma tumor-initiating cells from primary cultures. *Cell Cycle* 12(3):491-500.
3. Gianni T, Salvioli S, Chesnokova LS, Hutt-Fletcher LM, & Campadelli-Fiume G (2013) alphavbeta6- and alphavbeta8-integrins serve as interchangeable receptors for HSV gH/gL to promote endocytosis and activation of membrane fusion. *PLoS Pathog* 9(12):e1003806.
4. Blystone SD (2004) Integrating an integrin: a direct route to actin. *Biochim Biophys Acta* 1692(2-3):47-54.
5. Cocchi F, Menotti L, Mirandola P, Lopez M, & Campadelli-Fiume G (1998) The ectodomain of a novel member of the immunoglobulin subfamily related to the poliovirus receptor has the attributes of a bona fide receptor for herpes simplex virus types 1 and 2 in human cells. *J Virol* 72(12):9992-10002.
6. Gianni T, Leoni V, Chesnokova LS, Hutt-Fletcher LM, & Campadelli-Fiume G (2012) alphavbeta3-integrin is a major sensor and activator of innate immunity to herpes simplex virus-1. *Proc Natl Acad Sci U S A* 109(48):19792-19797.
7. Leoni V, et al. (2018) A fully-virulent retargeted oncolytic HSV armed with IL-12 elicits local immunity and vaccine therapy towards distant tumors. *PLoS Pathog* 14(8):e1007209.
